# Supplementary material for: IVA cloning: A single-tube universal cloning system exploiting bacterial In Vivo Assembly
Source: PubMed Central journal article supplement (PMC4893743; doi:10.1038/srep27459), 2016-06-06
Supplement: srep27459-s1.pdf [file srep27459-s1.pdf]

# IVA cloning: A single-tube universal cloning system exploiting bacterial *In Vivo* Assembly

Javier García-Nafría<sup>1,\*</sup>, Jake F. Watson<sup>1,+</sup> and Ingo H. Greger<sup>1</sup>

<sup>1</sup> Neurobiology Division, MRC Laboratory of Molecular Biology, Cambridge, CB2 0QH, UK

\* jgarcia@mrc-lmb.cam.ac.uk

+ these authors contributed equally to this work

## SUPPLEMENTARY MATERIAL

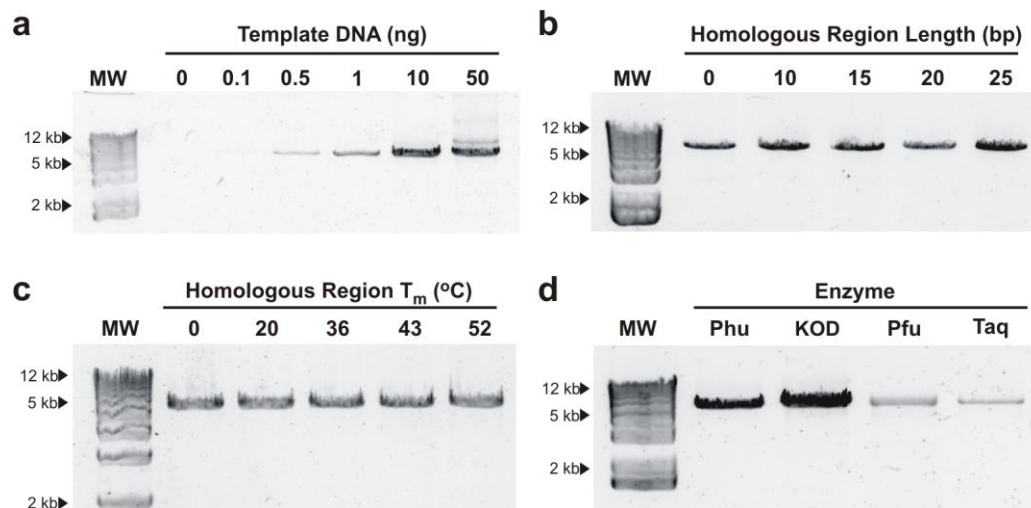

**Supplementary Figure S1. Method and primer optimisation.** Agarose gels showing PCR amplifications with increasing amount of template DNA (**A**). Using different homologous region lengths (**B**) and  $T_m$  (**C**), equivalent amplifications are seen in all cases, attributing the differences in colony formation exclusively to recombination efficiency. (**D**) Agarose gel showing difference in amplification efficiency for four polymerases performing the same deletion. (MW = 1 kb Plus Ladder).

**a** QuikChange primer design

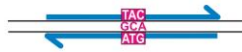

IVA primer design

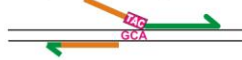

**b** Mutagenesis

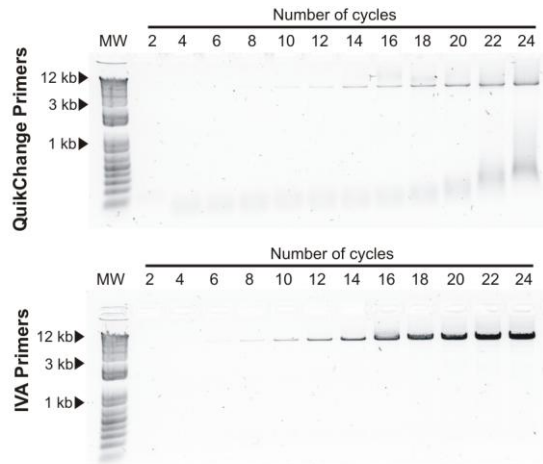

**c**

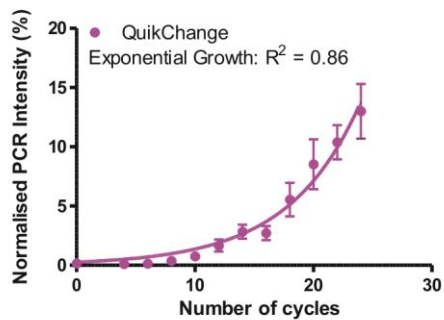

**Supplementary Figure S2. Insertion, deletion and mutagenesis amplifications. (A)** A comparison of primer design for mutagenesis using QuikChange™ (upper - blue) and IVA (lower - green). **(B)** Comparison of IVA and QuikChange™ amplification rates by examining band intensity every two PCR cycles. Higher intensity and no low molecular weight smearing are seen using IVA primers. (MW = 1 kb Plus Ladder). **(C)** When plotting intensity against cycle number, an exponential curve can be fitted ( $R^2 = 0.86$ ) when using QuikChange™ mutagenesis primers (normalised to IVA cloning).

**Supplementary Table S1. List of primers.** Homologous regions are shown in italics and mutation codons in bold.

| <b>Optimisation</b>       |                                                                |  |                     | <b>Function</b>                    |                                                                |
|---------------------------|----------------------------------------------------------------|--|---------------------|------------------------------------|----------------------------------------------------------------|
| <b>Template opt.</b>      |                                                                |  |                     |                                    |                                                                |
| OPT1-F                    | AATGACAGCTCATCCTCAGAGAACCGG                                    |  |                     | Amplify pRK5 without recombination |                                                                |
| OPT1-R                    | TCCTCCGTGAGAATGACCCAAAAGCC                                     |  |                     |                                    |                                                                |
| <b>Length opt.</b>        |                                                                |  | T <sub>m</sub> (°C) | Length (bp)                        |                                                                |
| OPT2-F                    | <i>CGCCCGGCGG</i> AATGACAGCTCATCCTCAGAGAACCGG                  |  | 40                  | 10                                 | Delete GluA3 NTD region in pRK5                                |
| OPT2-R                    | <i>CCGCCGGGCG</i> TCCTCCGTGAGAATGACCCAAAAGCC                   |  | 40                  | 10                                 |                                                                |
| OPT3-F                    | <i>CACGTCCAGAAGAAT</i> AATGACAGCTCATCCTCAGAGAACCGG             |  | 40                  | 15                                 |                                                                |
| OPT3-R                    | <i>ATTCTTCTGGACGTG</i> TCCTCCGTGAGAATGACCCAAAAGCC              |  | 40                  | 15                                 |                                                                |
| OPT4-F                    | <i>ATTCTTATGGACATTAATTA</i> AATGACAGCTCATCCTCAGAGAACCGG        |  | 40                  | 20                                 |                                                                |
| OPT4-R                    | <i>TAATTAATGTCCATAAGAAT</i> TCCTCCGTGAGAATGACCCAAAAGCC         |  | 40                  | 20                                 |                                                                |
| OPT5-F                    | <i>ATTATAATATTTACTATATATTATT</i> AATGACAGCTCATCCTCAGAGAACCGG   |  | 40                  | 25                                 |                                                                |
| OPT5-R                    | <i>AATAATATATAGTAAATATTATAAT</i> TCCTCCGTGAGAATGACCCAAAAGCC    |  | 40                  | 25                                 |                                                                |
| <b>T<sub>m</sub> opt.</b> |                                                                |  | GC%                 | T <sub>m</sub> (°C)                |                                                                |
| OPT6-F                    | <i>ATTATTAATTATTTA</i> AATGACAGCTCATCCTCAGAGAACCGG             |  | 0                   | 20                                 | Delete GluA3 NTD region in pRK5                                |
| OPT6-R                    | <i>TAAATAATTAATAAT</i> TCCTCCGTGAGAATGACCCAAAAGCC              |  | 0                   | 20                                 |                                                                |
| OPT7-F                    | <i>GTCATCAGTTCTTTC</i> AATGACAGCTCATCCTCAGAGAACCGG             |  | 40                  | 36                                 |                                                                |
| OPT7-R                    | <i>GAAAGAAGTATGAC</i> TCCTCCGTGAGAATGACCCAAAAGCC               |  | 40                  | 36                                 |                                                                |
| OPT8-F                    | <i>GACGTCAGCGTGGTA</i> AATGACAGCTCATCCTCAGAGAACCGG             |  | 60                  | 45                                 |                                                                |
| OPT8-R                    | <i>TACCACGCTGACGTC</i> TCCTCCGTGAGAATGACCCAAAAGCC              |  | 60                  | 45                                 |                                                                |
| OPT9-F                    | <i>GGCGTCAGCGCGGTC</i> AATGACAGCTCATCCTCAGAGAACCGG             |  | 80                  | 53                                 |                                                                |
| OPT9-R                    | <i>GACCGCGTGACGCC</i> TCCTCCGTGAGAATGACCCAAAAGCC               |  | 80                  | 53                                 |                                                                |
| <b>Delete/Insert</b>      |                                                                |  |                     |                                    |                                                                |
| INS1-F                    | <i>GAACAAAACTCATCTCAGAAGAGGATCTG</i> TTCCCAACACCATCAGCATAGGTGG |  |                     |                                    | Inserting myc tag at GluA3 N-terminus in pRK5-GluA3 (IVA)      |
| INS1-R                    | <i>TCTTCTGAGATGAGTTTTGTTC</i> TCCTCCGTGAGAATGACCCAAAAGCC       |  |                     |                                    |                                                                |
| INS2-F                    | <b>P</b> -TCAGAAGAGGATCTG TTCCCAACACCATCAGCATAGGTGG            |  |                     |                                    | Inserting myc tag at GluA3 N-terminus (phosphorylated primers) |
| INS2-R                    | <b>P</b> -GATGAGTTTTGTTC TCCTCCGTGAGAATGACCCAAAAGCC            |  |                     |                                    |                                                                |
| DEL1-F                    | <i>TGGGTCATTCTACGGAGGA</i> AATGACAGCTCATCCTCAGAGAACCGG         |  |                     |                                    | Deleting GluA3 N-terminal domain in pRK5-GluA3                 |
| DEL1-R                    | <i>TCCTCCGTGAGAATGACCCAAAAGCC</i>                              |  |                     |                                    |                                                                |
| DEL2-F                    | <i>CTGATTTTTGGTGTC</i> TCTTCTAACAGCATAAGATAGGGGGG              |  |                     |                                    | Deleting myc tag at GluA2 N-terminus in pIRES-GluA2            |
| DEL2-R                    | <i>GACACCAAAAATCAGTCCCATAAAACAG</i>                            |  |                     |                                    |                                                                |
| DELINS1-F                 | <i>GAAAACCTGTACTTCCAGTCC</i> ATG GTG AGC AAG GGC GAG GAG CTG   |  |                     |                                    | Replacing IRES with linker in pIRES-GluA2 EGFP                 |
| DELINS1-R                 | <i>GGACTGGAAGTACAGGTTTTT</i> CTCATTTCGTTTCGCTCGGCCCTTG         |  |                     |                                    |                                                                |

**Mutagenesis****IVA cloning**

|        |                                                            |                                 |
|--------|------------------------------------------------------------|---------------------------------|
| MUT1-F | CCAGATCGTGAAGCTA <b>TGC</b> AAGAATGGCATCGGGTACCACTACATCC   | GluA1 E202C mutation in pIRES-  |
| MUT1-R | <b>GCATAGCTT</b> CACGATCTGGCCAGGATG                        | GluA1                           |
| MUT2-F | ACTGAAGCATTCCGT <b>TCCCTT</b> CGGAAGCAGAGGATTGAAATATCCCG   | GluA2 N292S mutation in pIRES-  |
| MUT2-R | GGAACGGAA TGCTTCAGTCATCACTTGGACAG                          | GluA2                           |
| MUT3-F | ACAAATTGTGAGTGTT <b>TGC</b> AAGCATGTCAAAGGCTACCATTATATCATC | GluA4 G208C mutation in pRK5-   |
| MUT3-R | <b>GCAAACTC</b> CACAATTTGTTCTAAAATGTTTTGAAGC               | GluA4                           |
| MUT4-F | ACCGACTACCTCCAG <b>TAGT</b> CCGCCATCACCCGCATCCCC           | y2 A219STOP mutation in pGW1-y2 |
| MUT4-R | <b>CTACTGGAGG</b> TAGTCGGTGGCACGG                          |                                 |

**QuikChange mutagenesis**

|        |                                                   |                                 |
|--------|---------------------------------------------------|---------------------------------|
| MUT5-F | CCAGATCGTGAAGCTAT <b>GCA</b> AAGAATGGCATCG        | GluA1 E202C mutation in pIRES-  |
| MUT5-R | CGATGCCATTCTT <b>GCAT</b> AGCTTCACGATCTGG         | GluA1                           |
| MUT6-R | GACTGAAGCATTCCGTT <b>TCCCTT</b> CGGAAGCAGAGG      | GluA2 N292S mutation in pIRES-  |
| MUT6-F | CCTCTGCTTCCGAAG <b>GGAAC</b> GGAATGCTTCAGTC       | GluA2                           |
| MUT7-R | GAACAAATTGTGAGTGTT <b>TGCA</b> AAGCATGTCAAAGGCTAC | GluA4 G208C mutation in pRK5-   |
| MUT7-F | GTAGCCTTTGACATGCTT <b>GCAAACTC</b> CACAATTTGTTT   | GluA4                           |
| MUT8-F | CCGACTACCTCCAG <b>TAGT</b> CCGCCATCACCCG          | y2 A219STOP mutation in pGW1-y2 |
| MUT8-R | CGGGTGATGGCG <b>ACTACT</b> GGAGGTAGTCGG           |                                 |

**Subcloning**

|        |                                                              |                                             |
|--------|--------------------------------------------------------------|---------------------------------------------|
| SUB1-F | ACCGTCAGATCCGCTAGC ATGAAGACGAGCCGCCGCGGC                     | Amplifies GSG1L for pIRES vector            |
| SUB1-R | GATCTGAGTCCGGTAGC TCACACCCAGTGCCCCAGGACCC                    |                                             |
| SUB2-F | GCTACCGGACTCAGATCTCGAGC                                      | Amplifies pIRES vector for GSG1L            |
| SUB2-R | GCTAGCGGATCTGACGGTTCACTAAAC                                  |                                             |
| SUB3-F | TGGTACCGAGCTCGGATCC ATGCAAAAGATTATGCATATTTCTGTCTCCTTTCTC     | Amplifies GluA2 for pcDNA4/TO               |
| SUB3-R | GTGCTGGATATCTGCAGAATTC CTAATTTTAACTCTCGATGCCATATACGTTGTAAC   |                                             |
| SUB4-F | GAATTCTGCAGATATCCAGCACAGTGGC                                 | Amplifies pcDNA4/TO vector for GluA2        |
| SUB4-R | GGATCCGAGCTCGGTACCAAGCTTAAG                                  |                                             |
| SUB5-F | ATCGATAAGCTTGATTGAGCTAGCC ACCATGGTGAGCAAGGGCG                | Amplifies EGFP-Homer1c for AAV-CW3SL vector |
| SUB5-R | CTCGAGATAATCAACCTCTGGATTA TTAGCTGCATTCTAGTAGCTTGGCCAAATTATCC |                                             |

**Multi-site**

|        |                                                        |                                                    |
|--------|--------------------------------------------------------|----------------------------------------------------|
| INS3-F | GACTACAAGGACGACGATGACAAG TCTTCTAACAGCATAACAGATAGGGGGC  | Inserts FLAG at GluA2 N-terminus in pCustom vector |
| INS3-R | TCATCGTCGTCCTTGTAGTC GACACCAAAAATCAGTCCCATAAAACAGGAGA  |                                                    |
| DEL3-F | TTCCAGAATTTTGCAACTTAT AAGGAAGGTTACAACGTATATGGCATCGAGAG | Deletes FLAG at GluA2 C-terminus in pCustom vector |
| DEL3-R | ATAAGTTGCAAAATTCTGGGAATTCTGCGAGGAAG                    |                                                    |

|                   |                                                                  |                                                                       |
|-------------------|------------------------------------------------------------------|-----------------------------------------------------------------------|
| DELINS2-F         | AAGGATGACGACGATAAG AATGACAGCTCATCTCAGAGAACCGG                    | Exchanges GluA3 NTD for FLAG at<br>in pRK5-GluA3                      |
| DELINS2-R         | ATCGTCGTCATCCTTGAATCTCCGTGAGA                                    |                                                                       |
| SUB3-F            | AGATCGGAAGCGGAAGCGGC GGGCTGTTTGATCGAGGTGTTCAAATGC                | Amplifies $\gamma$ 2 for GluA3- $\gamma$ 2 tandem<br>construct        |
| SUB3-R            | CTTCTGGTGGGAAGGGATCC TCATACGGGCGTGGTCCGGCGG                      |                                                                       |
| SUB4-F            | GGATCCCTTCCCACCAGAAGCATG                                         | Amplifies pRK5-GluA3 vector for<br>GluA3- $\gamma$ 2 tandem construct |
| SUB4-R            | GCCGCTTCCGCTTCC GATCTTAACACTTTCTGTTCCATACACGTTGTAG               |                                                                       |
| <b>XhoI sites</b> |                                                                  |                                                                       |
| MUT9-F            | ATGGGGCAAAGCGTGCTC <b>GAG</b> GCGGTCTTCTTTTTAGTCTGGGGC           | XhoI site 1 in pRK5-GluA3                                             |
| MUT9-R            | <b>CTC</b> GAGCACGCTTTGCCCATTTTCTTCTG                            |                                                                       |
| MUT10-F           | ACTGGAAAGAGTCATGCATG <b>CTC</b> GAGCCAACATTACAGTTTTCCAGATTGTCAAC | XhoI site 2 in pRK5-GluA3                                             |
| MUT10-R           | <b>GAG</b> CATGCATGACTCTTTCCAGTAAAATGTCAGTAAAAC                  |                                                                       |
| MUT11-F           | GCAAGGATGTGATATTTCTC <b>GAG</b> GATCACTTTCTGGGCGCATTGTTGGAG      | XhoI site 3 in pRK5-GluA3                                             |
| MUT11-R           | <b>CTC</b> GAGAAATATCACATCCTTGCTGCATGAAAGCA                      |                                                                       |
| MUT12-R           | CCTGATGCGGTATTTTCTC <b>GAG</b> ACGCATCTGTGCGGTATTTACACCG         | XhoI site 4 in pRK5-GluA3                                             |
| MUT12-F           | <b>CTC</b> GAGAAAATACCGCATCAGGCGCCATTC                           |                                                                       |
| MUT13-R           | ACAAGCTGTGACCGT <b>CTC</b> GAGCTGCATGTGTCAGAGGTTTTACCC           | XhoI site 5 in pRK5-GluA3                                             |
| MUT13-F           | <b>GAG</b> ACGGTCACAGCTTGCTGTAAGC                                |                                                                       |
| <b>Assembly</b>   |                                                                  |                                                                       |
| ASS1-F            | GCAGTGAGCGCAACGCAA TGCTTAGGGTTAGGCGTTTTGCGC                      | Amplifies CMVtet for Assembly                                         |
| ASS1-R            | CTATGGAGGTCAAACAGCG TCTCTATCACTGATAGGGAGATCTCTATCAC              |                                                                       |
| ASS2-F            | CGCTGTTTTGACCTCCATAG ATGGTGAGCAAGGGCGAGGAGC                      | Amplifies EGFP for Assembly                                           |
| ASS2-R            | GATGGTGTGGGGAATCC CTTGTACAGCTCGTCCATGCCGAG                       |                                                                       |
| ASS3-F            | GGATTCCCAACACCATCAGCATAGG                                        | Amplifies GluA3 for Assembly                                          |
| ASS3-R            | GCCGCTTCCGCTTCC GATCTTAACACTTTCTGTTCCATACACGTTGTAG               |                                                                       |
| ASS4-F            | CGAAGCTTGAGCTCGAG TCATACGGGCGTGGTCCGGC                           | Amplifies $\gamma$ 2 for Assembly                                     |
| ASS4-R            | AGATCGGAAGCGGAAGCGGC GGGCTGTTTGATCGAGGTGTTCAAATGC                |                                                                       |
| ASS5-F            | TGGCCGCCATGGCCCAACTTG                                            | Amplifies pRK5-GluA4 vector for<br>Assembly                           |
| ASS5-R            | ATTGCGTTGCGCTCACTGCCCG                                           |                                                                       |
| <b>Library</b>    |                                                                  |                                                                       |
| LIB1-F            | TGGCCGCCATGGCCCAACTTG                                            | Amplifies pRK5-GluA3 vector for<br>Library                            |
| LIB1-R            | ATTGCGTTGCGCTCACTGCCCG                                           |                                                                       |
| LIB2-F            | GCAGTGAGCGCAACGCAAT GCTCGCCCGACATTGATTATTGACTAG                  | Amplifies CMV promoter for Library                                    |
| LIB2-R            | CTATGGAGGTCAAACAGCG AGCTCTGCTTATATAGACCTCCCACCG                  |                                                                       |

|        |                                                   |                                              |
|--------|---------------------------------------------------|----------------------------------------------|
| LIB3-F | GCAGTGAGCGCAACGCAAT CACTTGTGGACTAAGTTTGTTCGCATCC  | Amplifies CamKII promoter for Library        |
| LIB3-F | CTATGGAGGTCAAAACAGCG GCTGCCCCCAGAACTAGGGG         |                                              |
| LIB4-F | CGCTGTTTGACCTCCATAG CGAATTCGAATATGCCGTACATCTTTGCC | Amplifies GluA1 for Library from pIRES-GluA1 |
| LIB4-F | GGGCCATGGCGGCCA TTACAATCCTGTGGCTCCAAGGGC          |                                              |
| LIB5-F | CGCTGTTTGACCTCCATAG GCTAGCGGATTCTTCTGCCTTCACTTC   | Amplifies GluA2 for Library from pIRES-GluA2 |
| LIB5-F | GGGCCATGGCGGCCA CTCGAGGCACTCAGAAGGTTCTATC         |                                              |
| LIB6-F | CGCTGTTTGACCTCCATAG GAATTCGGCACGAGGTTGCGCC        | Amplifies GluA3 for Library from pIRES-GluA3 |
| LIB6-F | GGGCCATGGCGGCCA GGATCCCTAGATCTTAACACTTTCTGTTCC    |                                              |
